# Supplementary material
Source: PubMed Central journal article supplement (PMC7168547)
Supplement: TBED-66-1023-s001.pdf [file TBED-66-1023-s001.pdf]

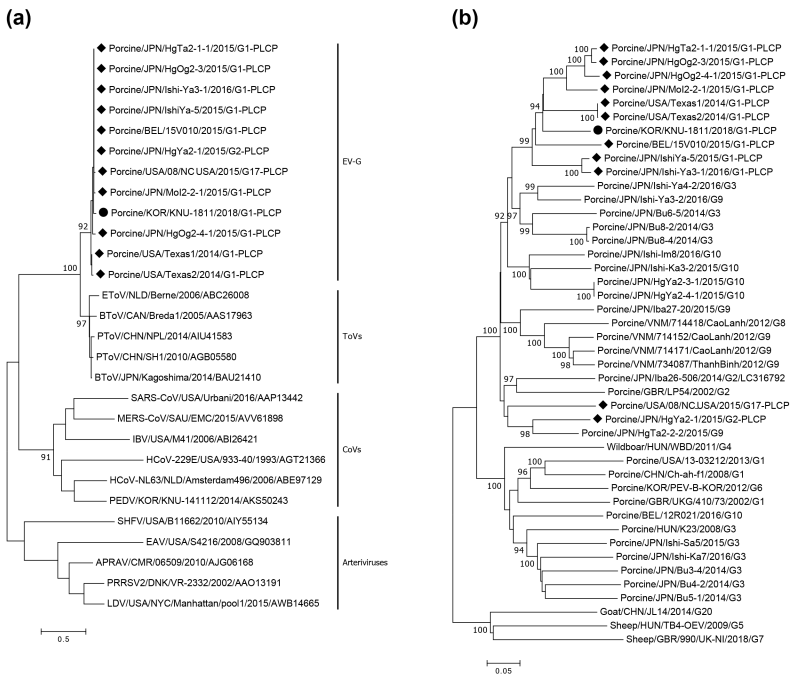

**Figure S1.** Phylogenetic analysis based on the PLCP genes of EV-Gs and nidoviruses, including toroviruses (ToVs), coronaviruses (CoVs), and arteriviruses (a) and full-length genomic sequences, excluding the insertion PLCP sequences of EV-G strains (b). Multiple sequence alignments were performed using the ClustalX 2.0 program, and the phylogenetic trees were constructed from the aligned nucleotide sequences using the neighbor-joining method. Numbers at each branch represent bootstrap values greater than 50% of 1000 replicates. Hosts of origin, geographical origins, names of the strains, years of isolation, genotypes, and GenBank accession numbers are shown. The genotypes are indicated on the right-hand side. A solid circle denotes the Korean recombinant EV-G1-PLCP strain identified in this study; solid diamonds indicate global EV-G PLCP strains reported in previous studies. Scale bars indicate nucleotide substitutions per site.

**Table S1** Comparison of the full-length genomes of reference EV-G strains with the Korean EV-G1-PLPC KNU-1811 strain

| KNU-1811                            | GBR/UKG/G1          | USA/Texas1/G1 | BEL/15V010/G1 | JPN/MoI2-2-1/G1 | JPN/HgYa2-1/G2 | USA/08_NC/G17 |
|-------------------------------------|---------------------|---------------|---------------|-----------------|----------------|---------------|
| % nt/aa identity to KOR/KNU-1811/G1 |                     |               |               |                 |                |               |
| <b>Genome regions (nt length)</b>   |                     |               |               |                 |                |               |
| 5' UTR (813)                        | 89.0/– <sup>†</sup> | 86.5/–        | 92.2/–        | 93.3/–          | 93.2/–         | 94.7/–        |
| VP4 (207)                           | 82.6/92.7           | 74.8/79.7     | 78.7/89.8     | 89.8/98.5       | 72.4/81.1      | 79.2/92.7     |
| VP2 (738)                           | 80.7/95.1           | 83.8/96.7     | 79.9/95.5     | 87.5/97.9       | 68.6/81.7      | 71.0/84.1     |
| VP3 (831)                           | 80.3/92.4           | 85.9/95.3     | 81.6/95.7     | 90.0/97.8       | 68.0/72.9      | 69.0/75.8     |
| VP1 (729)                           | 79.0/85.1           | 85.2/94.6     | 79.9/93.6     | 87.9/94.6       | 61.4/62.5      | 59.4/61.4     |
| 2A (450)                            | 81.3/93.3           | 85.7/94.6     | 83.5/96.0     | 83.1/94.6       | 80.4/92.6      | 87.3/95.3     |
| 2B (297)                            | 75.4/81.8           | 82.4/94.9     | 86.5/100      | 85.8/96.9       | 87.2/97.9      | 89.5/97.9     |
| 2C (987)                            | 77.0/86.3           | 86.2/97.5     | 86.5/97.2     | 87.5/99.0       | 88.6/99.0      | 87.6/96.6     |
| PLCP (594)                          | –/–                 | 71.5/75.0     | 77.3/76.8     | 77.8/80.1       | 77.0/79.2      | 82.6/89.3     |
| 3A (267)                            | 74.1/85.3           | 84.2/96.6     | 84.2/93.2     | 82.7/98.8       | 82.7/96.6      | 82.3/96.6     |
| 3B (66)                             | 81.8/95.4           | 86.3/100      | 84.8/100      | 87.8/100        | 86.3/100       | 87.8/100      |
| 3C (549)                            | 71.9/84.6           | 87.6/100      | 86.5/97.8     | 83.9/95.6       | 86.3/100       | 86.5/97.8     |
| 3D (1,386)                          | 78.8/88.0           | 90.2/98.0     | 85.4/97.8     | 86.5/98.0       | 86.8/97.3      | 85.8/97.1     |
| 3' UTR (71)                         | 82.4/–              | 35.2/–        | 80.0/–        | 73.2/–          | 70.4/–         | 98.5/–        |

<sup>†</sup> Not applicable.
